# Supplementary material for: High Heritabilities for Antibiotic Usage Show Potential to Breed for Disease Resistance in Finishing Pigs
Source: MDPI journal article supplement (doi:10.3390/antibiotics10070829), 2021-07-08
Supplement: s1 [file s1]

**Table S1.** Extra information on administered antibiotics

*Additional File 1 Table S1. Extra information on administered antibiotics. The LA-factor (Long Acting) is used to calculate treatment incidences to account for a possible long acting effect (AMCRA, 2020). Only parenterally administered antibiotics were used in this study.*

| Class antibiotics | Active compound | Commercial drug name                 | Concentration<br>(mg/ml) | LA-factor |
|-------------------|-----------------|--------------------------------------|--------------------------|-----------|
| Amfenicoles       | Florfenicol     | Florfenikel®, Kela                   | 300                      | 2         |
| Aminopenicillines | Amoxicillin     | Vetrimoxin Long Acting®, Ceva        | 150                      | 1         |
|                   |                 | Santé Animale NV                     |                          |           |
| Aminosides        | Paromomycin     | Gabbrovet®, Ceva Santé               | 175                      | 1         |
|                   |                 | Animale NV                           |                          |           |
| Cephalosporins    | Ceftiofur       | Ceftiosan®, Alfasan                  | 50                       | 1         |
|                   |                 | International BV                     |                          |           |
| Cephalosporins    | Cefquinome      | Cobactan 2,5%®, Intervet             | 25                       | 1         |
|                   |                 | International BV                     |                          |           |
| Cephalosporins    | Ceftiofur       | Excenel Flow®, Zoetis Belgium        | 50                       | 1         |
|                   |                 | SA                                   |                          |           |
| Fluoroquinolones  | Enrofloxacin    | Fenoflox®, Chanelle                  | 50                       | 1         |
|                   |                 | Pharmaceuticals Manufacturing<br>Ltd |                          |           |
| Lincosamides      | Lincomycin      | Lincomycine-VMD®, VMD NV             | 100                      | 1         |
| Macrolides        | Tulathromycin   | Draxxin®, Zoetis Belgium SA          | 100                      | 9         |
| sulfonamides-     | Trimethoprim    | Dofatrim-ject®, Dopharma             | 40                       | 1         |
| trimethoprim      | Sulfadoxine     | Research BV                          | 200                      |           |
